# Supplementary material
Source: PubMed Central journal article supplement (PMC7159272)
Supplement: mmc1.pdf [file mmc1.pdf]

# THE LANCET

## **Supplementary appendix**

This appendix formed part of the original submission and has been peer reviewed.  
We post it as supplied by the authors.

Supplement to: Yang J, Siri JG, Remais JV, et al. The Tsinghua–*Lancet* Commission on Healthy Cities in China: unlocking the power of cities for a healthy China. *Lancet* 2018; published online April 17. [http://dx.doi.org/10.1016/S0140-6736\(18\)30486-0](http://dx.doi.org/10.1016/S0140-6736(18)30486-0).

# The Tsinghua-*Lancet* Commission on Healthy Cities in China: unlocking the power of cities for a healthy china

Appendix 1 Targets included in the Healthy China 2030 plan

Appendix 2 Urban population growth rates in prefecture-level cities and above in China between 1978 and 2015

Appendix 3 Names of cities in China and their populations by 2015

Appendix 4 The development of Hygienic Cities in China between 1990 and 2015

Appendix 5 Comparison of health city indicators used in China and in Europe

Appendix 6 Methodological notes for the survey of actions adopted by cities in China in building healthy cities

Appendix 7 Methodological notes on the calculation of the Baidu indices for hand-foot-mouth diseases

## Appendix 1 Targets included in the Healthy China 2030 plan

|                               | Indicator                                                                                                       | 2015 | 2030                                     |
|-------------------------------|-----------------------------------------------------------------------------------------------------------------|------|------------------------------------------|
| Health status                 | Life expectancy (years)                                                                                         | 76.3 | 79.0                                     |
|                               | Infant mortality (% per 1000 people)                                                                            | 8.1  | 5.0                                      |
|                               | Under-5 mortality (% per 1000 people)                                                                           | 10.7 | 6.0                                      |
|                               | Maternal mortality (per 100 000 people)                                                                         | 20.1 | 12.0                                     |
|                               | People meeting the fitness standards defined in the National Physical Fitness standards (% of total population) | 89.6 | 92.2                                     |
| Healthy living                | Health literacy (% of total population)                                                                         | 10   | 30                                       |
|                               | Frequent physical exercises (100 million)                                                                       | 3.6  | 5.3                                      |
| Health service and protection | Premature death rate from major chronic diseases (% of total population)                                        | 19.1 | 30% lower than in 2015                   |
|                               | Practicing or assistant physicians per 1000 people                                                              | 2.2  | 3.0                                      |
|                               | Out-of-pocket payment as a share of total health expenditure (% of total expenditure)                           | 29.3 | about 25                                 |
| Healthy environment           | Percentage of days with good air quality* in cities at prefecture level or above (%)                            | 76.7 | >80 by 2020, then continuous improvement |
|                               | Percentage of surface water scoring at least level 3† (%)                                                       | 66   | >70 by 2020, then continuous improvement |
| Health industry               | Total size of industry                                                                                          | ..   | ¥16 trillion (US\$2.3 trillion in 2017)  |

\*Good air quality means that the air quality index is less than 100. †Level 3 water quality refers to water that can be used for drinking, fishing, and swimming.

Source: Central Committee of Chinese Communist Party. State Council. The Plan for Healthy China 2030. Beijing: Government of the People's Republic of China, 2016.

**Appendix 2 Urban population growth rates in prefecture-level cities and above in China between 1978 and 2015**

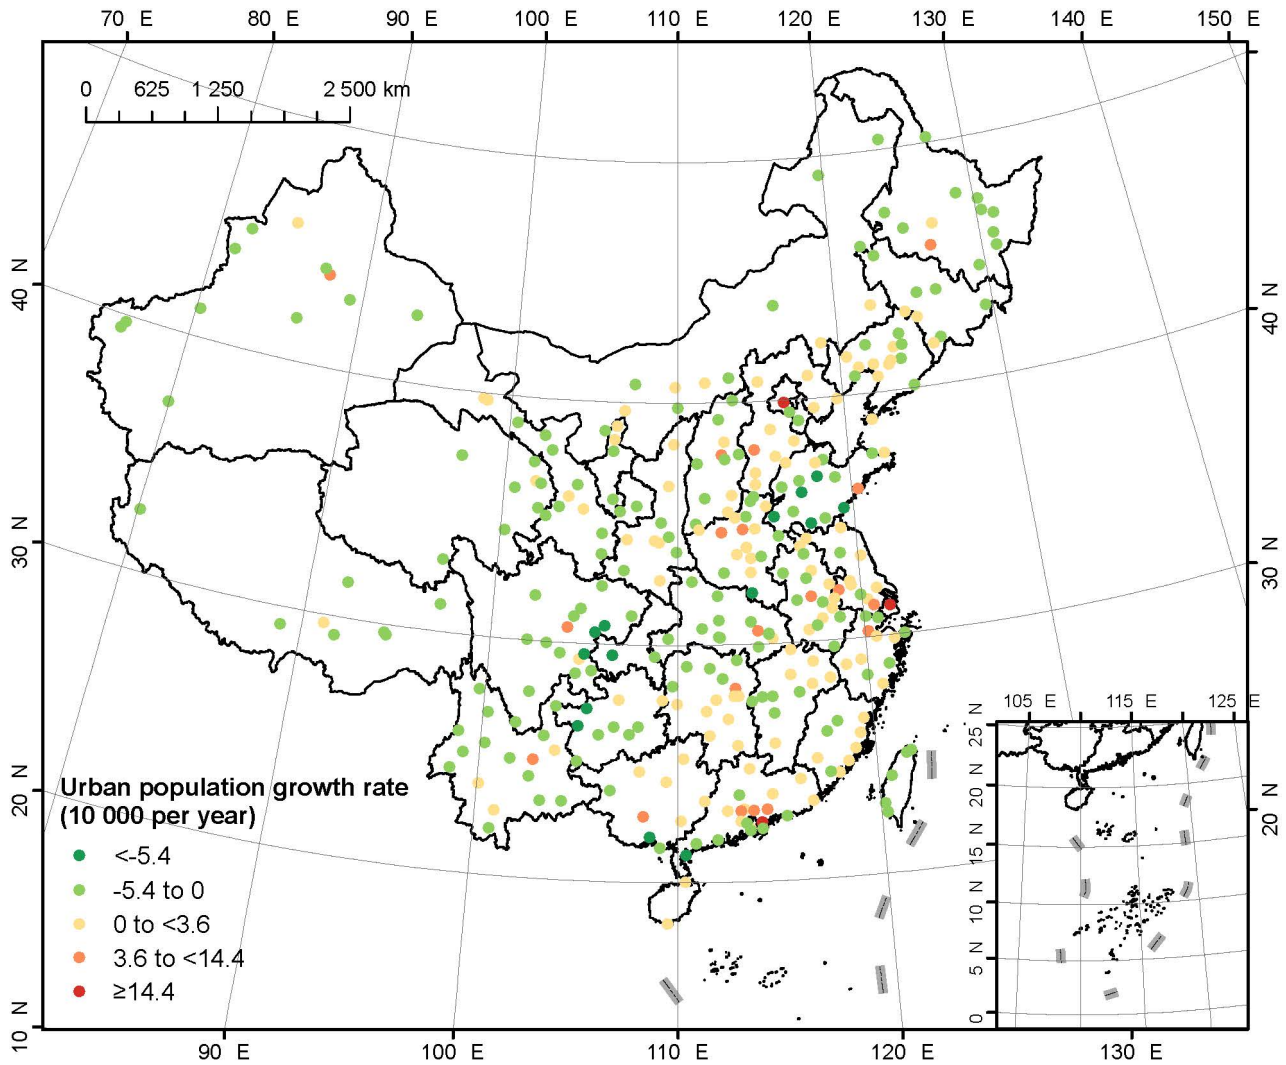

**Figure A1** Urban population growth rates in prefecture-level cities and above in China between 1978 and 2015 (Data source: National Bureau of Statistics of China)

### **Appendix 3 Names of cities in China and their populations by 2015**

The list of cities was taken from *China City Statistical Yearbook 2016*<sup>1</sup>. Household registered population, i.e., people with *Hukou*, for each city was taken from the same book. Permanent resident population for province and the proportion of urban population was taken from *China Statistical Abstract 2016*<sup>2</sup>. Permanent resident population refers to people who stay in a city for more than half of the year, which include both people who registered with the city and people who registered in other cities. Beijing, Tianjin, Shanghai, and Chongqing are four municipalities directly under the central government. They are considered as province-level cities. We explained in panel 2 that cities in China include both urban and rural parts. Here populations for the entire city and for urban districts under the city were reported for each prefecture-level city. For county-level city, the total population was reported. The proportion of urban population in permanent resident population was only reported at the province level.

#### Reference

1. National Bureau of Statistics. *China City Statistical Yearbook 2016*. Beijing: China Statistics Press; 2016.
2. National Bureau of Statistics. *China Statistical Abstract 2016*. Beijing: China Statistics Press; 2016.

Table 1. Names of provinces and cities in China and their populations by 2015

| Province         | City at prefecture level and above | County-level city | Household registered population (10 000) |                      | Permanent resident population (10 000) | % of urban population in permanent resident population |
|------------------|------------------------------------|-------------------|------------------------------------------|----------------------|----------------------------------------|--------------------------------------------------------|
|                  |                                    |                   | All city                                 | Districts under city |                                        |                                                        |
| <b>Beijing</b>   |                                    |                   | <b>1345</b>                              | <b>1345</b>          | <b>2171</b>                            | <b>86.50</b>                                           |
| <b>Tianjin</b>   |                                    |                   | <b>1027</b>                              | <b>1027</b>          | <b>1547</b>                            | <b>82.64</b>                                           |
| <b>Shanghai</b>  |                                    |                   | <b>1443</b>                              | <b>1376</b>          | <b>2415</b>                            | <b>87.60</b>                                           |
| <b>Chongqing</b> |                                    |                   | <b>3372</b>                              | <b>2129</b>          | <b>3017</b>                            | <b>60.94</b>                                           |
| <b>Hebei</b>     |                                    |                   | <b>7651</b>                              | <b>1778</b>          | <b>7425</b>                            | <b>51.33</b>                                           |
|                  | <i>Shijiazhuang</i>                |                   | <i>1029</i>                              | <i>410</i>           |                                        |                                                        |
|                  |                                    | Xinji             | 64                                       |                      |                                        |                                                        |
|                  |                                    | Jinzhou           | 57                                       |                      |                                        |                                                        |
|                  |                                    | Xinle             | 51                                       |                      |                                        |                                                        |
|                  | <i>Tangshan</i>                    |                   | <i>755</i>                               | <i>334</i>           |                                        |                                                        |
|                  |                                    | Zunhua            | 76                                       |                      |                                        |                                                        |
|                  |                                    | Qian'an           | 76                                       |                      |                                        |                                                        |
|                  | <i>Qinhuangdao</i>                 |                   | <i>296</i>                               | <i>141</i>           |                                        |                                                        |
|                  | <i>Handan</i>                      |                   | <i>1050</i>                              | <i>176</i>           |                                        |                                                        |
|                  |                                    | Wuan              | 84                                       |                      |                                        |                                                        |
|                  | <i>Xingtai</i>                     |                   | <i>780</i>                               | <i>88</i>            |                                        |                                                        |
|                  |                                    | Nangong           | 50                                       |                      |                                        |                                                        |
|                  |                                    | Shahe             | 45                                       |                      |                                        |                                                        |
|                  | <i>Baoding</i>                     |                   | <i>1202</i>                              | <i>282</i>           |                                        |                                                        |
|                  |                                    | Dingzhou          | 124                                      |                      |                                        |                                                        |
|                  |                                    | Zhuozhou          | 68                                       |                      |                                        |                                                        |
|                  |                                    | Anguo             | 42                                       |                      |                                        |                                                        |
|                  |                                    | Gaobeidian        | 58                                       |                      |                                        |                                                        |
|                  | <i>Zhangjiakou</i>                 |                   | <i>469</i>                               | <i>91</i>            |                                        |                                                        |
|                  | <i>Chengde</i>                     |                   | <i>382</i>                               | <i>60</i>            |                                        |                                                        |
|                  | <i>Cangzhou</i>                    |                   | <i>774</i>                               | <i>55</i>            |                                        |                                                        |
|                  |                                    | Renqiu            | 89                                       |                      |                                        |                                                        |
|                  |                                    | Botou             | 63                                       |                      |                                        |                                                        |
|                  |                                    | Huanghua          | 48                                       |                      |                                        |                                                        |
|                  |                                    | Hejian            | 88                                       |                      |                                        |                                                        |

|                       |                  |          |             |            |             |              |
|-----------------------|------------------|----------|-------------|------------|-------------|--------------|
|                       | <i>Langfang</i>  |          | 461         | 85         |             |              |
|                       |                  | Bazhou   | 65          |            |             |              |
|                       |                  | Sanhe    | 65          |            |             |              |
|                       | <i>Hengshui</i>  |          | 452         | 56         |             |              |
|                       |                  | Jizhou   | 35          |            |             |              |
|                       |                  | Shenzhou | 58          |            |             |              |
| <b>Shanxi</b>         |                  |          | <b>3498</b> | <b>983</b> | <b>3664</b> | <b>55.03</b> |
|                       | <i>Taiyuan</i>   |          | 367         | 285        |             |              |
|                       |                  | Gujiao   | 22          |            |             |              |
|                       | <i>Datong</i>    |          | 316         | 157        |             |              |
|                       | <i>Yangquan</i>  |          | 132         | 70         |             |              |
|                       | <i>Changzhi</i>  |          | 337         | 73         |             |              |
|                       |                  | Lucheng  | 23          |            |             |              |
|                       | <i>Jincheng</i>  |          | 219         | 38         |             |              |
|                       |                  | Gaoping  | 48          |            |             |              |
|                       | <i>Shuozhou</i>  |          | 162         | 67         |             |              |
|                       | <i>Jinzhong</i>  |          | 330         | 61         |             |              |
|                       |                  | Jiexiu   | 43          |            |             |              |
|                       | <i>Xinzhou</i>   |          | 307         | 54         |             |              |
|                       |                  | Yuanping | 49          |            |             |              |
|                       | <i>Linfen</i>    |          | 431         | 81         |             |              |
|                       |                  | Houma    | 24          |            |             |              |
|                       |                  | Huozhou  | 31          |            |             |              |
|                       | <i>Yuncheng</i>  |          | 510         | 68         |             |              |
|                       |                  | Yongji   | 44          |            |             |              |
|                       |                  | Hejin    | 40          |            |             |              |
|                       | <i>Lvliang</i>   |          | 387         | 28         |             |              |
|                       |                  | Xiaoyi   | 50          |            |             |              |
|                       |                  | Fenyang  | 43          |            |             |              |
| <b>Inner Mongolia</b> |                  |          | <b>2154</b> | <b>690</b> | <b>2511</b> | <b>60.30</b> |
|                       | <i>Hohhot</i>    |          | 239         | 130        |             |              |
|                       | <i>Baotou</i>    |          | 224         | 156        |             |              |
|                       | <i>Wuhai</i>     |          | 44          | 44         |             |              |
|                       | <i>Chifeng</i>   |          | 463         | 126        |             |              |
|                       | <i>Tongliao</i>  |          | 319         | 85         |             |              |
|                       | <i>Hulunbuir</i> |          | 259         | 37         |             |              |

|                 |                 |            |             |             |             |              |
|-----------------|-----------------|------------|-------------|-------------|-------------|--------------|
|                 |                 | Horgos     | 8           |             |             |              |
|                 |                 | Manzhouli  | 17          |             |             |              |
|                 |                 | Zhalantun  | 41          |             |             |              |
|                 |                 | Yakeshi    | 34          |             |             |              |
|                 |                 | Genhe      | 14          |             |             |              |
|                 |                 | Erguna     | 8           |             |             |              |
|                 | <i>ErDOS</i>    |            | 157         | 28          |             |              |
|                 | <i>Ulanqab</i>  |            | 274         | 32          |             |              |
|                 |                 | Fengzhen   | 32          |             |             |              |
|                 | <i>Bayannur</i> |            | 175         | 52          |             |              |
|                 |                 |            |             |             |             |              |
|                 |                 | Erlanhaote | 3           |             |             |              |
|                 |                 | Wulanhaote | 32          |             |             |              |
|                 |                 | Xilinhaote | 18          |             |             |              |
|                 |                 | Aershan    | 5           |             |             |              |
| <b>Liaoning</b> |                 |            | <b>4230</b> | <b>1913</b> | <b>4382</b> | <b>67.35</b> |
|                 | <i>Shenyang</i> |            | 730         | 530         |             |              |
|                 |                 | Xinmin     | 68          |             |             |              |
|                 | <i>Dalian</i>   |            | 594         | 305         |             |              |
|                 |                 | Wafangdian | 100         |             |             |              |
|                 |                 | Zhuanghe   | 90          |             |             |              |
|                 | <i>Anshan</i>   |            | 346         | 150         |             |              |
|                 |                 | Haicheng   | 108         |             |             |              |
|                 | <i>Fushun</i>   |            | 216         | 141         |             |              |
|                 | <i>Benxi</i>    |            | 151         | 93          |             |              |
|                 | <i>Dandong</i>  |            | 238         | 78          |             |              |
|                 |                 | Donggang   | 61          |             |             |              |
|                 |                 | Fengcheng  | 57          |             |             |              |
|                 | <i>Jinzhou</i>  |            | 303         | 97          |             |              |
|                 |                 | Linhai     | 52          |             |             |              |
|                 |                 | Beizhen    | 52          |             |             |              |
|                 | <i>Yingkou</i>  |            | 233         | 93          |             |              |
|                 |                 | Dashiqiao  | 70          |             |             |              |
|                 |                 | Gaizhou    | 70          |             |             |              |
|                 | <i>Fuxin</i>    |            | 189         | 76          |             |              |
|                 | <i>Liaoyang</i> |            | 179         | 87          |             |              |
|                 |                 | Dengta     | 45          |             |             |              |



|              |                  |              |             |            |             |              |
|--------------|------------------|--------------|-------------|------------|-------------|--------------|
|              | <i>Panjin</i>    |              | 130         | 65         |             |              |
|              | <i>Tieling</i>   |              | 300         | 44         |             |              |
|              |                  | Diaobingshan | 24          |            |             |              |
|              |                  | Kaiyuan      | 58          |            |             |              |
|              | <i>Chaoyang</i>  |              | 341         | 61         |             |              |
|              |                  | Beipiao      | 58          |            |             |              |
|              |                  | Lingyuan     | 69          |            |             |              |
|              | <i>Huludao</i>   |              | 280         | 94         |             |              |
|              |                  | Xingcheng    | 54          |            |             |              |
| <b>Jilin</b> |                  |              | <b>2448</b> | <b>930</b> | <b>2753</b> | <b>55.31</b> |
|              | <i>Changchun</i> |              | 754         | 436        |             |              |
|              |                  | Yushu        | 126         |            |             |              |
|              |                  | Dehui        | 94          |            |             |              |
|              | <i>Jilin</i>     |              | 426         | 182        |             |              |
|              |                  | Huadian      | 44          |            |             |              |
|              |                  | Jiaohe       | 44          |            |             |              |
|              |                  | Shulan       | 64          |            |             |              |
|              | <i>Siping</i>    |              | 326         | 58         |             |              |
|              |                  | Gongzhuling  | 106         |            |             |              |
|              |                  | Shuangliao   | 37          |            |             |              |
|              | <i>Liaoyuan</i>  |              | 121         | 47         |             |              |
|              | <i>Tonghua</i>   |              | 221         | 44         |             |              |
|              |                  | Meihekou     | 61          |            |             |              |
|              |                  | Ji'an        | 22          |            |             |              |
|              | <i>Baishan</i>   |              | 125         | 57         |             |              |
|              |                  | Linjiang     |             |            |             |              |
|              | <i>Baicheng</i>  |              | 197         | 50         |             |              |
|              |                  | Taonan       | 43          |            |             |              |
|              |                  | Daan         | 41          |            |             |              |
|              | <i>Songyuan</i>  |              | 278         | 57         |             |              |
|              |                  | Fuyu         | 72          |            |             |              |
|              |                  | Yanji        | 54          |            |             |              |
|              |                  | Tumen        | 12          |            |             |              |
|              |                  | Dunhua       | 47          |            |             |              |
|              |                  | Hunchun      | 27          |            |             |              |
|              |                  | Longjing     | 17          |            |             |              |
|              |                  | Helong       | 18          |            |             |              |

|                     |                     |             |             |             |             |              |
|---------------------|---------------------|-------------|-------------|-------------|-------------|--------------|
| <b>Heilongjiang</b> |                     |             | <b>3641</b> | <b>1385</b> | <b>3812</b> | <b>58.80</b> |
|                     | <i>Harbin</i>       |             | 961         | 549         |             |              |
|                     |                     | Shangzhi    | 58          |             |             |              |
|                     |                     | Wuchang     | 92          |             |             |              |
|                     | <i>Qiqihar</i>      |             | 549         | 137         |             |              |
|                     |                     | Nehe        | 71          |             |             |              |
|                     | <i>Jixi</i>         |             | 182         | 83          |             |              |
|                     |                     | Mishan      | 35          |             |             |              |
|                     |                     | Hulin       | 16          |             |             |              |
|                     | <i>Hegang</i>       |             | 106         | 65          |             |              |
|                     | <i>Shuangyashan</i> |             | 147         | 19          |             |              |
|                     | <i>Daqing</i>       |             | 275         | 136         |             |              |
|                     | <i>Yichun</i>       |             | 121         | 77          |             |              |
|                     |                     | Tieli       | 37          |             |             |              |
|                     | <i>Jiamusi</i>      |             | 238         | 78          |             |              |
|                     |                     | Tongjiang   | 11          |             |             |              |
|                     |                     | Fujin       | 38          |             |             |              |
|                     | <i>Qitaihe</i>      |             | 83          | 50          |             |              |
|                     | <i>Mudanjiang</i>   |             | 262         | 88          |             |              |
|                     |                     | Suifenhe    | 7           |             |             |              |
|                     |                     | Hailin      | 39          |             |             |              |
|                     |                     | Ning'an     | 43          |             |             |              |
|                     |                     | Muling      | 29          |             |             |              |
|                     |                     | Dongning    | 21          |             |             |              |
|                     | <i>Heihe</i>        |             | 168         | 20          |             |              |
|                     |                     | Beian       | 38          |             |             |              |
|                     |                     | Wudalianchi | 36          |             |             |              |
|                     | <i>Suihua</i>       |             | 549         | 84          |             |              |
|                     |                     | Anda        | 47          |             |             |              |
|                     |                     | Zhaodong    | 91          |             |             |              |
|                     |                     | Hailun      | 78          |             |             |              |
| <b>Jiangsu</b>      |                     |             | <b>7718</b> | <b>3509</b> | <b>7976</b> | <b>66.52</b> |
|                     | <i>Nanjing</i>      |             | 653         | 653         |             |              |
|                     | <i>Wuxi</i>         |             | 481         | 249         |             |              |
|                     |                     | Jiangyin    | 124         |             |             |              |
|                     |                     | Yixing      | 108         |             |             |              |
|                     | <i>Xuzhou</i>       |             | 1029        | 333         |             |              |

|                 |                    |              |             |             |             |              |
|-----------------|--------------------|--------------|-------------|-------------|-------------|--------------|
|                 |                    | Xinyi        | 113         |             |             |              |
|                 |                    | Pizhou       | 188         |             |             |              |
|                 | <i>Changzhou</i>   |              | 371         | 291         |             |              |
|                 |                    | Liyang       | 80          |             |             |              |
|                 | <i>Suzhou</i>      |              | 667         | 341         |             |              |
|                 |                    | Changshu     | 107         |             |             |              |
|                 |                    | Zhangjiagang | 92          |             |             |              |
|                 |                    | Kunshan      | 79          |             |             |              |
|                 |                    | Taicang      | 48          |             |             |              |
|                 | <i>Nantong</i>     |              | 767         | 213         |             |              |
|                 |                    | Qidong       | 112         |             |             |              |
|                 |                    | Rugao        | 144         |             |             |              |
|                 |                    | Haimen       | 100         |             |             |              |
|                 | <i>Lianyungang</i> |              | 531         | 221         |             |              |
|                 | <i>Huaian</i>      |              | 564         | 294         |             |              |
|                 | <i>Yancheng</i>    |              | 828         | 242         |             |              |
|                 |                    | Dongtai      | 113         |             |             |              |
|                 | <i>Yangzhou</i>    |              | 461         | 232         |             |              |
|                 |                    | Yizheng      | 57          |             |             |              |
|                 |                    | Gaoyou       | 82          |             |             |              |
|                 | <i>Zhenjiang</i>   |              | 272         | 103         |             |              |
|                 |                    | Danyang      | 81          |             |             |              |
|                 |                    | Yangzhong    | 28          |             |             |              |
|                 |                    | Jurong       | 59          |             |             |              |
|                 | <i>Taizhou</i>     |              | 508         | 164         |             |              |
|                 |                    | Xinghua      | 158         |             |             |              |
|                 |                    | Taixing      | 120         |             |             |              |
|                 |                    | Jingjiang    | 67          |             |             |              |
|                 | <i>Suqian</i>      |              | 586         | 174         |             |              |
| <b>Zhejiang</b> |                    |              | <b>4873</b> | <b>1798</b> | <b>5508</b> | <b>65.80</b> |
|                 | <i>Hangzhou</i>    |              | 724         | 533         |             |              |
|                 |                    | Jiande       | 51          |             |             |              |
|                 |                    | Lin'an       | 53          |             |             |              |
|                 | <i>Ningbo</i>      |              | 587         | 232         |             |              |
|                 |                    | Yuyao        | 84          |             |             |              |
|                 |                    | Cixi         | 105         |             |             |              |
|                 |                    | Fenghua      | 48          |             |             |              |

|              |                  |           |             |             |             |              |
|--------------|------------------|-----------|-------------|-------------|-------------|--------------|
|              | <i>Wenzhou</i>   |           | 811         | 166         |             |              |
|              |                  | Ruian     | 123         |             |             |              |
|              |                  | Leqing    | 128         |             |             |              |
|              | <i>Jiaying</i>   |           | 349         | 87          |             |              |
|              |                  | Haining   | 68          |             |             |              |
|              |                  | Pinghu    | 49          |             |             |              |
|              |                  | Tongxiang | 69          |             |             |              |
|              | <i>Huzhou</i>    |           | 264         | 111         |             |              |
|              | <i>Shaoxing</i>  |           | 443         | 218         |             |              |
|              |                  | Zhuji     | 108         |             |             |              |
|              |                  | Shengzhou | 73          |             |             |              |
|              | <i>Jinhua</i>    |           | 478         | 96          |             |              |
|              |                  | Lanxi     | 66          |             |             |              |
|              |                  | Yiwu      | 77          |             |             |              |
|              |                  | Dongyang  | 84          |             |             |              |
|              |                  | Yongkang  | 60          |             |             |              |
|              | <i>Quzhou</i>    |           | 256         | 85          |             |              |
|              |                  | Jiangshan | 61          |             |             |              |
|              | <i>Zhoushan</i>  |           | 97          | 71          |             |              |
|              | <i>Taizhou</i>   |           | 597         | 159         |             |              |
|              |                  | Linhai    | 120         |             |             |              |
|              |                  | Wenling   | 122         |             |             |              |
|              | <i>Lishui</i>    |           | 266         | 40          |             |              |
|              |                  | Longquan  | 29          |             |             |              |
| <b>Anhui</b> |                  |           | <b>6949</b> | <b>2017</b> | <b>6144</b> | <b>50.50</b> |
|              | <i>Hefei</i>     |           | 718         | 251         |             |              |
|              |                  | Caohu     | 86          |             |             |              |
|              | <i>Wuhu</i>      |           | 385         | 146         |             |              |
|              | <i>Bengbu</i>    |           | 376         | 114         |             |              |
|              | <i>Huainan</i>   |           | 246         | 184         |             |              |
|              | <i>Maanshan</i>  |           | 229         | 82          |             |              |
|              | <i>Huaibei</i>   |           | 217         | 105         |             |              |
|              | <i>Tongling</i>  |           | 74          | 45          |             |              |
|              | <i>Anqing</i>    |           | 622         | 74          |             |              |
|              |                  | Tongcheng | 75          |             |             |              |
|              | <i>Huangshan</i> |           | 148         | 45          |             |              |
|              | <i>Fuyang</i>    |           | 1043        | 223         |             |              |

|                |                   |           |             |             |             |              |
|----------------|-------------------|-----------|-------------|-------------|-------------|--------------|
|                |                   | Jieshou   | 80          |             |             |              |
|                | <i>Bozhou</i>     |           | 635         | 163         |             |              |
|                | <i>Chuzhou</i>    |           | 449         | 54          |             |              |
|                |                   | Tianchang | 63          |             |             |              |
|                |                   | Mingguang | 64          |             |             |              |
|                | <i>Lu'an</i>      |           | 718         | 190         |             |              |
|                | <i>Chizhou</i>    |           | 162         | 67          |             |              |
|                | <i>Xuancheng</i>  |           | 280         | 87          |             |              |
|                |                   | Ningguo   | 39          |             |             |              |
| <b>Fujian</b>  |                   |           | <b>3721</b> | <b>1072</b> | <b>3839</b> | <b>62.60</b> |
|                | <i>Fuzhou</i>     |           | 678         | 200         |             |              |
|                |                   | Fuqing    | 134         |             |             |              |
|                |                   | Changle   | 71          |             |             |              |
|                | <i>Xiamen</i>     |           | 211         | 211         |             |              |
|                | <i>Putian</i>     |           | 344         | 231         |             |              |
|                | <i>Sanming</i>    |           | 284         | 28          |             |              |
|                |                   | Yong'an   | 33          |             |             |              |
|                | <i>Quanzhou</i>   |           | 722         | 108         |             |              |
|                |                   | Shishi    | 33          |             |             |              |
|                |                   | Jinjiang  | 119         |             |             |              |
|                |                   | Nan'an    | 159         |             |             |              |
|                | <i>Zhangzhou</i>  |           | 502         | 59          |             |              |
|                |                   | Longhai   | 86          |             |             |              |
|                | <i>Nanping</i>    |           | 320         | 86          |             |              |
|                |                   | Shaowu    | 31          |             |             |              |
|                |                   | Wuyishan  | 24          |             |             |              |
|                |                   | Jian'ou   | 55          |             |             |              |
|                | <i>Longyan</i>    |           | 309         | 102         |             |              |
|                |                   | Zhangping | 30          |             |             |              |
|                | <i>Ningde</i>     |           | 349         | 48          |             |              |
|                |                   | Fu'an     | 67          |             |             |              |
|                |                   | Fuding    | 59          |             |             |              |
| <b>Jiangxi</b> |                   |           | <b>4914</b> | <b>1198</b> | <b>4566</b> | <b>51.62</b> |
|                | <i>Nanchang</i>   |           | 520         | 301         |             |              |
|                | <i>Jingdezhen</i> |           | 167         | 46          |             |              |
|                |                   | Leping    | 93          |             |             |              |
|                | <i>Pingxiang</i>  |           | 198         | 88          |             |              |

|                 |                  |               |             |             |             |              |
|-----------------|------------------|---------------|-------------|-------------|-------------|--------------|
|                 | <i>Jiujiang</i>  |               | 517         | 67          |             |              |
|                 |                  | Ruichang      | 46          |             |             |              |
|                 |                  | Gongqingcheng | 7           |             |             |              |
|                 | <i>Xinyu</i>     |               | 124         | 89          |             |              |
|                 | <i>Yintan</i>    |               | 127         | 24          |             |              |
|                 |                  | Guixi         | 64          |             |             |              |
|                 | <i>Ganzhou</i>   |               | 961         | 154         |             |              |
|                 |                  | Ruijin        | 70          |             |             |              |
|                 | <i>Shangrao</i>  |               | 774         | 139         |             |              |
|                 |                  | Dexing        | 34          |             |             |              |
|                 | <i>Fuzhou</i>    |               | 399         | 118         |             |              |
|                 | <i>Ji'an</i>     |               | 530         | 58          |             |              |
|                 |                  | Jinggangshan  | 17          |             |             |              |
|                 | <i>Yichun</i>    |               | 597         | 113         |             |              |
|                 |                  | Zhangshu      | 61          |             |             |              |
|                 |                  | Fengcheng     | 149         |             |             |              |
|                 |                  | Gaoan         | 87          |             |             |              |
| <b>Shandong</b> |                  |               | <b>9822</b> | <b>3231</b> | <b>9847</b> | <b>57.01</b> |
|                 | <i>Jinan</i>     |               | 626         | 366         |             |              |
|                 |                  | Zhangqiu      | 103         |             |             |              |
|                 | <i>Qingdao</i>   |               | 783         | 373         |             |              |
|                 |                  | Jiaozhou      | 83          |             |             |              |
|                 |                  | Jimo          | 115         |             |             |              |
|                 |                  | Pingdu        | 139         |             |             |              |
|                 |                  | Laixi         | 74          |             |             |              |
|                 | <i>Zibo</i>      |               | 430         | 286         |             |              |
|                 | <i>Zaozhuang</i> |               | 408         | 238         |             |              |
|                 |                  | Tengzhou      | 170         |             |             |              |
|                 | <i>Dongying</i>  |               | 191         | 86          |             |              |
|                 | <i>Yantai</i>    |               | 653         | 185         |             |              |
|                 |                  | Longkou       | 64          |             |             |              |
|                 |                  | Laiyang       | 86          |             |             |              |
|                 |                  | Laizhou       | 85          |             |             |              |
|                 |                  | Penglai       | 45          |             |             |              |
|                 |                  | Zhaoyuan      | 57          |             |             |              |
|                 |                  | Qixia         | 61          |             |             |              |
|                 |                  | Haiyang       | 66          |             |             |              |

|              |                     |           |              |             |             |              |
|--------------|---------------------|-----------|--------------|-------------|-------------|--------------|
|              | <i>Weifang</i>      |           | 894          | 187         |             |              |
|              |                     | Qingzhou  | 94           |             |             |              |
|              |                     | Zhucheng  | 110          |             |             |              |
|              |                     | Shouguang | 107          |             |             |              |
|              |                     | Gaomi     | 96           |             |             |              |
|              |                     | Changyi   | 59           |             |             |              |
|              |                     | Anqiu     | 96           |             |             |              |
|              | <i>Jining</i>       |           | 867          | 183         |             |              |
|              |                     | Qufu      | 64           |             |             |              |
|              |                     | Zoucheng  | 119          |             |             |              |
|              | <i>Tai'an</i>       |           | 566          | 162         |             |              |
|              |                     | Xintai    | 141          |             |             |              |
|              |                     | Feicheng  | 99           |             |             |              |
|              | <i>Dezhou</i>       |           | 587          | 122         |             |              |
|              |                     | Laoling   | 71           |             |             |              |
|              |                     | Yucheng   | 53           |             |             |              |
|              | <i>Weihai</i>       |           | 255          | 132         |             |              |
|              |                     | Rongcheng | 67           |             |             |              |
|              |                     | Rushan    | 56           |             |             |              |
|              | <i>Liaocheng</i>    |           | 622          | 123         |             |              |
|              |                     | Linqing   | 80           |             |             |              |
|              | <i>Linyi</i>        |           | 1124         | 262         |             |              |
|              | <i>Laiwu</i>        |           | 128          | 128         |             |              |
|              | <i>Rizhao</i>       |           | 296          | 134         |             |              |
|              | <i>Heze</i>         |           | 1003         | 158         |             |              |
|              | <i>Binzhou</i>      |           | 389          | 108         |             |              |
| <b>Henan</b> |                     |           | <b>11103</b> | <b>2070</b> | <b>9480</b> | <b>46.85</b> |
|              | <i>Zhengzhou</i>    |           | 810          | 344         |             |              |
|              |                     | Gongyi    | 84           |             |             |              |
|              |                     | Xinmi     | 89           |             |             |              |
|              |                     | Xingyang  | 68           |             |             |              |
|              |                     | Xinzheng  | 61           |             |             |              |
|              |                     | Dengfeng  | 72           |             |             |              |
|              | <i>Kaifeng</i>      |           | 554          | 87          |             |              |
|              | <i>Luoyang</i>      |           | 728          | 201         |             |              |
|              |                     | Yanshi    | 63           |             |             |              |
|              | <i>Pingdingshan</i> |           | 562          | 110         |             |              |

|              |                  |               |             |             |             |              |
|--------------|------------------|---------------|-------------|-------------|-------------|--------------|
|              |                  | Ruzhou        | 115         |             |             |              |
|              |                  | Wugang        | 45          |             |             |              |
|              | <i>Anyang</i>    |               | 617         | 116         |             |              |
|              |                  | Linzhou       | 113         |             |             |              |
|              | <i>Hebi</i>      |               | 169         | 64          |             |              |
|              | <i>Xinxiang</i>  |               | 637         | 105         |             |              |
|              |                  | Huixian       | 87          |             |             |              |
|              |                  | Weihui        | 54          |             |             |              |
|              | <i>Jiaozuo</i>   |               | 372         | 98          |             |              |
|              |                  | Qinyang       | 49          |             |             |              |
|              |                  | Mengzhou      | 38          |             |             |              |
|              | <i>Puyang</i>    |               | 429         | 71          |             |              |
|              | <i>Xuchang</i>   |               | 505         | 42          |             |              |
|              |                  | Yuzhou        | 132         |             |             |              |
|              |                  | Changge       | 79          |             |             |              |
|              | <i>Luohe</i>     |               | 268         | 135         |             |              |
|              | <i>Sanmenxia</i> |               | 228         | 29          |             |              |
|              |                  | Yima          | 16          |             |             |              |
|              |                  | Lingbao       | 75          |             |             |              |
|              | <i>Shangqiu</i>  |               | 961         | 182         |             |              |
|              |                  | Yongcheng     | 158         |             |             |              |
|              | <i>Nanyang</i>   |               | 1189        | 188         |             |              |
|              |                  | Dengzhou      | 177         |             |             |              |
|              | <i>Xinyang</i>   |               | 898         | 153         |             |              |
|              | <i>Zhoukou</i>   |               | 1244        | 60          |             |              |
|              |                  | Xiangcheng    | 124         |             |             |              |
|              | <i>Zhumadian</i> |               | 931         | 84          |             |              |
|              |                  | <i>Jiyuan</i> | 71          |             |             |              |
| <b>Hubei</b> |                  |               | <b>5308</b> | <b>1586</b> | <b>5852</b> | <b>56.85</b> |
|              | <i>Wuhan</i>     |               | 829         | 516         |             |              |
|              | <i>Huangshi</i>  |               | 268         | 85          |             |              |
|              |                  | Daye          | 97          |             |             |              |
|              | <i>Shiyan</i>    |               | 346         | 118         |             |              |
|              |                  | Danjiangkou   | 46          |             |             |              |
|              | <i>Jingzhou</i>  |               | 643         | 98          |             |              |
|              |                  | Shishou       | 63          |             |             |              |
|              |                  | Honghu        | 93          |             |             |              |



|              |                  |            |             |             |             |              |
|--------------|------------------|------------|-------------|-------------|-------------|--------------|
|              |                  | Songzi     | 84          |             |             |              |
|              | <i>Yichang</i>   |            | 398         | 128         |             |              |
|              |                  | Yidu       | 40          |             |             |              |
|              |                  | Dangyang   | 47          |             |             |              |
|              |                  | Zhijiang   | 49          |             |             |              |
|              | <i>Xiangyang</i> |            | 592         | 225         |             |              |
|              |                  | Laohekou   | 52          |             |             |              |
|              |                  | Zaoyang    | 114         |             |             |              |
|              |                  | Yicheng    | 56          |             |             |              |
|              | <i>Ezhou</i>     |            | 110         | 110         |             |              |
|              | <i>Jingmen</i>   |            | 299         | 60          |             |              |
|              |                  | Zhongxiang | 106         |             |             |              |
|              | <i>Xiaogan</i>   |            | 526         | 97          |             |              |
|              |                  | Yingcheng  | 67          |             |             |              |
|              |                  | Anlu       | 62          |             |             |              |
|              |                  | Hanchuan   | 112         |             |             |              |
|              | <i>Huanggang</i> |            | 744         | 35          |             |              |
|              |                  | Macheng    | 117         |             |             |              |
|              |                  | Wuxue      | 82          |             |             |              |
|              | <i>Xianning</i>  |            | 300         | 61          |             |              |
|              |                  | Chibi      | 53          |             |             |              |
|              | <i>Suizhou</i>   |            | 251         | 53          |             |              |
|              |                  | Guangshui  | 93          |             |             |              |
|              |                  |            |             |             |             |              |
|              |                  | Lichuan    | 92          |             |             |              |
|              |                  | Enshi      | 81          |             |             |              |
|              |                  | Xiantao    | 156         |             |             |              |
|              |                  | Tianmen    | 163         |             |             |              |
|              |                  | Qianjiang  | 102         |             |             |              |
| <b>Hunan</b> |                  |            | <b>6947</b> | <b>1391</b> | <b>6783</b> | <b>50.89</b> |
|              | <i>Changsha</i>  |            | 680         | 319         |             |              |
|              |                  | Liuyang    | 147         |             |             |              |
|              | <i>Zhuzhou</i>   |            | 403         | 96          |             |              |
|              |                  | Liling     | 106         |             |             |              |
|              | <i>Xiangtan</i>  |            | 289         | 87          |             |              |
|              |                  | Xiangxiang | 92          |             |             |              |
|              |                  | Shaoshan   | 12          |             |             |              |

|                  |                    |               |             |             |              |              |
|------------------|--------------------|---------------|-------------|-------------|--------------|--------------|
|                  | <i>Hengyang</i>    |               | 799         | 100         |              |              |
|                  |                    | Leiyang       | 142         |             |              |              |
|                  |                    | Changning     | 96          |             |              |              |
|                  | <i>Shaoyang</i>    |               | 821         | 70          |              |              |
|                  |                    | Wugang        | 84          |             |              |              |
|                  | <i>Yueyang</i>     |               | 564         | 109         |              |              |
|                  |                    | Miluo         | 75          |             |              |              |
|                  |                    | Lingxiang     | 54          |             |              |              |
|                  | <i>Yiyang</i>      |               | 481         | 136         |              |              |
|                  |                    | Yuanjiang     | 75          |             |              |              |
|                  | <i>Changde</i>     |               | 609         | 141         |              |              |
|                  |                    | Jinshi        | 25          |             |              |              |
|                  | <i>Chenzhou</i>    |               | 528         | 77          |              |              |
|                  |                    | Zixing        | 38          |             |              |              |
|                  | <i>Yongzhou</i>    |               | 635         | 116         |              |              |
|                  | <i>Huaihua</i>     |               | 518         | 38          |              |              |
|                  |                    | Hongjiang     | 50          |             |              |              |
|                  | <i>Zhangjiajie</i> |               | 170         | 52          |              |              |
|                  | <i>Loudi</i>       |               | 448         | 49          |              |              |
|                  |                    | Lengshuijiang | 37          |             |              |              |
|                  |                    | Lianyuan      | 118         |             |              |              |
|                  |                    |               |             |             |              |              |
|                  |                    | Jishou        | 31          |             |              |              |
| <b>Guangdong</b> |                    |               | <b>8994</b> | <b>4419</b> | <b>10849</b> | <b>68.71</b> |
|                  | <i>Guangzhou</i>   |               | 854         | 854         |              |              |
|                  | <i>Shaoguan</i>    |               | 330         | 93          |              |              |
|                  |                    | Lechang       | 53          |             |              |              |
|                  |                    | Nanxiong      | 48          |             |              |              |
|                  | <i>Shenzhen</i>    |               | 355         | 355         |              |              |
|                  | <i>Zhuhai</i>      |               | 112         | 112         |              |              |
|                  | <i>Shantou</i>     |               | 550         | 543         |              |              |
|                  | <i>Foshan</i>      |               | 389         | 389         |              |              |
|                  | <i>Jiangmen</i>    |               | 391         | 140         |              |              |
|                  |                    | Taishan       | 97          |             |              |              |
|                  |                    | Heshan        | 37          |             |              |              |
|                  |                    | Kaiping       | 68          |             |              |              |
|                  | <i>Zhanjiang</i>   |               | 823         | 163         |              |              |

|                |                      |           |             |             |             |              |
|----------------|----------------------|-----------|-------------|-------------|-------------|--------------|
|                |                      | Lianjiang | 180         |             |             |              |
|                |                      | Leizhou   | 177         |             |             |              |
|                |                      | Wuchuan   | 119         |             |             |              |
|                | <i>Huizhou</i>       |           | 357         | 145         |             |              |
|                | <i>Maoming</i>       |           | 786         | 290         |             |              |
|                |                      | Gaozhou   | 178         |             |             |              |
|                |                      | Huazhou   | 173         |             |             |              |
|                |                      | Xinyi     | 145         |             |             |              |
|                | <i>Zhaoqing</i>      |           | 438         | 134         |             |              |
|                |                      | Sihui     | 46          |             |             |              |
|                | <i>Chaozhou</i>      |           | 273         | 166         |             |              |
|                | <i>Meizhou</i>       |           | 544         | 97          |             |              |
|                |                      | Xinning   | 118         |             |             |              |
|                | <i>Zhongshan</i>     |           | 159         | 159         |             |              |
|                | <i>Dongguan</i>      |           | 195         | 195         |             |              |
|                | <i>Shanwei</i>       |           | 359         | 52          |             |              |
|                |                      | Lufeng    | 187         |             |             |              |
|                | <i>Heyuan</i>        |           | 366         | 31          |             |              |
|                | <i>Yangjiang</i>     |           | 292         | 120         |             |              |
|                |                      | Yangchun  | 122         |             |             |              |
|                | <i>Qingyuan</i>      |           | 419         | 137         |             |              |
|                |                      | Lianzhou  | 53          |             |             |              |
|                |                      | Yingde    | 110         |             |             |              |
|                | <i>Jieyang</i>       |           | 702         | 209         |             |              |
|                |                      | Puning    | 246         |             |             |              |
|                | <i>Yunfu</i>         |           | 299         | 33          |             |              |
|                |                      | Luoding   | 129         |             |             |              |
|                |                      |           |             |             |             |              |
| <b>Guangxi</b> |                      |           | <b>5518</b> | <b>1530</b> | <b>4796</b> | <b>47.06</b> |
|                | <i>Nanning</i>       |           | 740         | 290         |             |              |
|                | <i>Liuzhou</i>       |           | 382         | 120         |             |              |
|                | <i>Guilin</i>        |           | 529         | 128         |             |              |
|                | <i>Wuzhou</i>        |           | 344         | 79          |             |              |
|                |                      | Cenxi     | 95          |             |             |              |
|                | <i>Beihai</i>        |           | 172         | 65          |             |              |
|                | <i>Fangchenggang</i> |           | 96          | 57          |             |              |
|                |                      | Dongxing  | 15          |             |             |              |

|                |                  |            |             |             |             |              |
|----------------|------------------|------------|-------------|-------------|-------------|--------------|
|                | <i>Qinzhou</i>   |            | 404         | 148         |             |              |
|                | <i>Yulin</i>     |            | 711         | 109         |             |              |
|                |                  | Beiliu     | 148         |             |             |              |
|                | <i>Guigang</i>   |            | 549         | 198         |             |              |
|                |                  | Guiping    | 200         |             |             |              |
|                | <i>Baise</i>     |            | 413         | 36          |             |              |
|                |                  | Jingxi     | 66          |             |             |              |
|                | <i>Laibin</i>    |            | 266         | 111         |             |              |
|                |                  | Heshan     | 14          |             |             |              |
|                | <i>Chongzuo</i>  |            | 249         | 37          |             |              |
|                |                  | Pingxiang  | 11          |             |             |              |
|                | <i>Hezhou</i>    |            | 240         | 118         |             |              |
|                | <i>Hechi</i>     |            | 425         | 34          |             |              |
|                |                  | Yizhou     | 66          |             |             |              |
| <b>Hainan</b>  |                  |            | <b>319</b>  | <b>223</b>  | <b>911</b>  | <b>55.12</b> |
|                | <i>Haikou</i>    |            | 165         | 165         |             |              |
|                | <i>Sanya</i>     |            | 58          | 58          |             |              |
|                | <i>Sansha</i>    |            | 0.04        | 0.04        |             |              |
|                |                  | Wuzhishan  | 11          |             |             |              |
|                |                  | Qionghai   | 51          |             |             |              |
|                |                  | Wenchang   | 57          |             |             |              |
|                |                  | Wanning    | 64          |             |             |              |
|                |                  | Dongfang   | 44          |             |             |              |
| <b>Sichuan</b> |                  |            | <b>8397</b> | <b>2791</b> | <b>8204</b> | <b>47.69</b> |
|                | <i>Chengdu</i>   |            | 1228        | 698         |             |              |
|                |                  | Dujiangyan | 62          |             |             |              |
|                |                  | Pengzhou   | 81          |             |             |              |
|                |                  | Qionglai   | 66          |             |             |              |
|                |                  | Chongzhou  | 67          |             |             |              |
|                | <i>Zigong</i>    |            | 327         | 151         |             |              |
|                | <i>Panzhihua</i> |            | 111         | 68          |             |              |
|                | <i>Luzhou</i>    |            | 506         | 150         |             |              |
|                | <i>Deyang</i>    |            | 390         | 69          |             |              |
|                |                  | Guanghan   | 61          |             |             |              |
|                |                  | Shifang    | 44          |             |             |              |
|                |                  | Mianzhu    | 51          |             |             |              |

|                |                   |           |             |            |             |              |
|----------------|-------------------|-----------|-------------|------------|-------------|--------------|
|                | <i>Miayang</i>    |           | 545         | 128        |             |              |
|                |                   | Jiangyou  | 89          |            |             |              |
|                | <i>Guangyuan</i>  |           | 305         | 93         |             |              |
|                | <i>Suining</i>    |           | 379         | 152        |             |              |
|                | <i>Neijiang</i>   |           | 420         | 141        |             |              |
|                | <i>Ziyang</i>     |           | 504         | 110        |             |              |
|                |                   | Jianyang  | 149         |            |             |              |
|                | <i>Leshan</i>     |           | 354         | 116        |             |              |
|                |                   | Emeishan  | 43          |            |             |              |
|                | <i>Yibin</i>      |           | 552         | 127        |             |              |
|                | <i>Nanchong</i>   |           | 742         | 194        |             |              |
|                |                   | Langzhong | 86          |            |             |              |
|                | <i>Dazhou</i>     |           | 683         | 180        |             |              |
|                |                   | Wanyuan   | 59          |            |             |              |
|                | <i>Guang'an</i>   |           | 467         | 127        |             |              |
|                |                   | Huaying   | 36          |            |             |              |
|                | <i>Yaan</i>       |           | 155         | 62         |             |              |
|                | <i>Meishan</i>    |           | 349         | 88         |             |              |
|                | <i>Bazhong</i>    |           | 380         | 136        |             |              |
|                |                   |           |             |            |             |              |
|                |                   | Kangding  | 11          |            |             |              |
|                |                   | Maerkang  | 6           |            |             |              |
|                |                   | Xichang   | 65          |            |             |              |
| <b>Guizhou</b> |                   |           | <b>3156</b> | <b>715</b> | <b>3530</b> | <b>42.01</b> |
|                | <i>Guiyang</i>    |           | 392         | 236        |             |              |
|                |                   | Qingzhen  | 52          |            |             |              |
|                | <i>Liupanshui</i> |           | 333         | 47         |             |              |
|                | <i>Zunyi</i>      |           | 793         | 91         |             |              |
|                |                   | Chishui   | 31          |            |             |              |
|                |                   | Renhuai   | 70          |            |             |              |
|                | <i>Anshun</i>     |           | 296         | 131        |             |              |
|                | <i>Tongren</i>    |           | 437         | 47         |             |              |
|                | <i>Bijie</i>      |           | 904         | 162        |             |              |
|                |                   |           |             |            |             |              |
|                |                   | Kaili     | 57          |            |             |              |
|                |                   | Xingyi    | 85          |            |             |              |
|                |                   | Fuquan    | 33          |            |             |              |

|                |                  |            |             |             |             |              |
|----------------|------------------|------------|-------------|-------------|-------------|--------------|
|                |                  | Duyun      | 49          |             |             |              |
| <b>Yunnan</b>  |                  |            | <b>2884</b> | <b>648</b>  | <b>4742</b> | <b>43.33</b> |
|                | <i>Kunming</i>   |            | 556         | 279         |             |              |
|                |                  | Anning     | 27          |             |             |              |
|                | <i>Yuxi</i>      |            | 216         | 44          |             |              |
|                | <i>Qujing</i>    |            | 648         | 73          |             |              |
|                |                  | Xuanwei    | 153         |             |             |              |
|                | <i>Zhaotong</i>  |            | 599         | 89          |             |              |
|                | <i>Lijiang</i>   |            | 121         | 15          |             |              |
|                | <i>Baoshan</i>   |            | 259         | 92          |             |              |
|                |                  | Tengchong  | 67          |             |             |              |
|                | <i>Puer</i>      |            | 250         | 23          |             |              |
|                | <i>Lincang</i>   |            | 235         | 32          |             |              |
|                |                  |            |             |             |             |              |
|                |                  | Dali       | 62          |             |             |              |
|                |                  | Chuxiong   | 52          |             |             |              |
|                |                  | Mangshi    | 39          |             |             |              |
|                |                  | Ruli       | 13          |             |             |              |
|                |                  | Kaiyuan    | 28          |             |             |              |
|                |                  | Geju       | 39          |             |             |              |
|                |                  | Jinghong   | 42          |             |             |              |
|                |                  | Wenshan    | 49          |             |             |              |
|                |                  | Mengzi     | 40          |             |             |              |
|                |                  | Mile       | 54          |             |             |              |
|                |                  | Shangri-La | 15          |             |             |              |
| <b>Xizang</b>  |                  |            | <b>324</b>  | <b>90</b>   | <b>324</b>  | <b>27.74</b> |
|                | <i>Lhasa</i>     |            | 53          | 21          |             |              |
|                | <i>Xigaze</i>    |            | 75          | 16          |             |              |
|                | <i>Qamdo</i>     |            | 73          | 11          |             |              |
|                |                  |            |             |             |             |              |
| <b>Shaanxi</b> |                  |            | <b>3922</b> | <b>1346</b> | <b>3793</b> | <b>53.92</b> |
|                | <i>Xi'an</i>     |            | 816         | 621         |             |              |
|                | <i>Tongchuan</i> |            | 84          | 74          |             |              |
|                | <i>Baoji</i>     |            | 385         | 142         |             |              |
|                | <i>Xiayang</i>   |            | 528         | 92          |             |              |
|                |                  | Xingping   | 62          |             |             |              |
|                | <i>Yan'an</i>    |            | 236         | 47          |             |              |

|                |                   |             |             |            |             |              |
|----------------|-------------------|-------------|-------------|------------|-------------|--------------|
|                | <i>Hanzhong</i>   |             | 385         | 58         |             |              |
|                | <i>Weinan</i>     |             | 557         | 97         |             |              |
|                |                   | Hancheng    | 40          |            |             |              |
|                |                   | Huayin      | 26          |            |             |              |
|                | <i>Yulin</i>      |             | 377         | 57         |             |              |
|                | <i>Shangluo</i>   |             | 251         | 56         |             |              |
|                | <i>Ankang</i>     |             | 305         | 101        |             |              |
| <b>Gansu</b>   |                   |             | <b>2454</b> | <b>813</b> | <b>2600</b> | <b>43.19</b> |
|                | <i>Lanzhou</i>    |             | 322         | 205        |             |              |
|                | <i>Jiayuguan</i>  |             | 20          | 20         |             |              |
|                | <i>Jinchang</i>   |             | 46          | 21         |             |              |
|                | <i>Baiyin</i>     |             | 181         | 49         |             |              |
|                | <i>Tianshui</i>   |             | 367         | 131        |             |              |
|                | <i>Wuwei</i>      |             | 190         | 103        |             |              |
|                | <i>Zhangye</i>    |             | 130         | 51         |             |              |
|                | <i>Pingliang</i>  |             | 233         | 51         |             |              |
|                | <i>Jiuquan</i>    |             | 112         | 42         |             |              |
|                |                   | Yumen       | 16          |            |             |              |
|                |                   | Dunhuang    | 14          |            |             |              |
|                | <i>Qingyang</i>   |             | 267         | 38         |             |              |
|                | <i>Dingxi</i>     |             | 301         | 46         |             |              |
|                | <i>Longnan</i>    |             | 286         | 56         |             |              |
|                |                   |             |             |            |             |              |
|                |                   | Linxia      | 25          |            |             |              |
|                |                   | Hezuo       | 9           |            |             |              |
| <b>Qinghai</b> |                   |             | <b>371</b>  | <b>136</b> | <b>588</b>  | <b>50.30</b> |
|                | <i>Xining</i>     |             | 201         | 94         |             |              |
|                | <i>Haidong</i>    |             | 170         | 41         |             |              |
|                |                   |             |             |            |             |              |
|                |                   | Golmud      | 14          |            |             |              |
|                |                   | Delingha    | 8           |            |             |              |
|                |                   | Yushu       | 11          |            |             |              |
| <b>Ningxia</b> |                   |             | <b>664</b>  | <b>279</b> | <b>668</b>  | <b>55.23</b> |
|                | <i>Yinchuan</i>   |             | 179         | 109        |             |              |
|                | <i>Shizuishan</i> |             | 75          | 43         |             |              |
|                | <i>Wuzhong</i>    |             | 140         | 40         |             |              |
|                |                   | Qingtongxia | 28          |            |             |              |

|                 |                 |            |               |              |               |              |
|-----------------|-----------------|------------|---------------|--------------|---------------|--------------|
|                 | <i>Guyuan</i>   |            | 150           | 46           |               |              |
|                 | <i>Zhongwei</i> |            | 120           | 41           |               |              |
| <b>Xinjiang</b> |                 |            | <b>297</b>    | <b>291</b>   | <b>2360</b>   | <b>47.23</b> |
|                 | <i>Urumqi</i>   |            | 267           | 261          |               |              |
|                 | <i>Karamay</i>  |            | 30            | 30           |               |              |
|                 |                 | Sihezi     | 39            |              |               |              |
|                 |                 | Cocodala   | 8             |              |               |              |
|                 |                 | Hami       | 43            |              |               |              |
|                 |                 | Changji    | 37            |              |               |              |
|                 |                 | Kuitun     | 16            |              |               |              |
|                 |                 | Yining     | 55            |              |               |              |
|                 |                 | Tacheng    | 15            |              |               |              |
|                 |                 | Aletai     | 20            |              |               |              |
|                 |                 | Bole       | 26            |              |               |              |
|                 |                 | Korla      | 49            |              |               |              |
|                 |                 | Akesu      | 51            |              |               |              |
|                 |                 | Atus       | 27            |              |               |              |
|                 |                 | Kashi      | 63            |              |               |              |
|                 |                 | Hetian     | 35            |              |               |              |
|                 |                 | Fukang     | 17            |              |               |              |
|                 |                 | Wusu       | 23            |              |               |              |
|                 |                 | Alar       | 22            |              |               |              |
|                 |                 | Tumushuke  | 17            |              |               |              |
|                 |                 | Beitun     | 5             |              |               |              |
|                 |                 | Alashankou | 1             |              |               |              |
|                 |                 | Tiemenguan | 5             |              |               |              |
|                 |                 | Horgos     | 7             |              |               |              |
|                 |                 | Wujiaqu    | 9             |              |               |              |
|                 |                 | Shuanghe   | 5             |              |               |              |
| <b>Total</b>    |                 |            | <b>137462</b> | <b>77116</b> | <b>137462</b> | <b>56.10</b> |



**Appendix 4 The development of Hygienic Cities in China between 1990 and 2015**

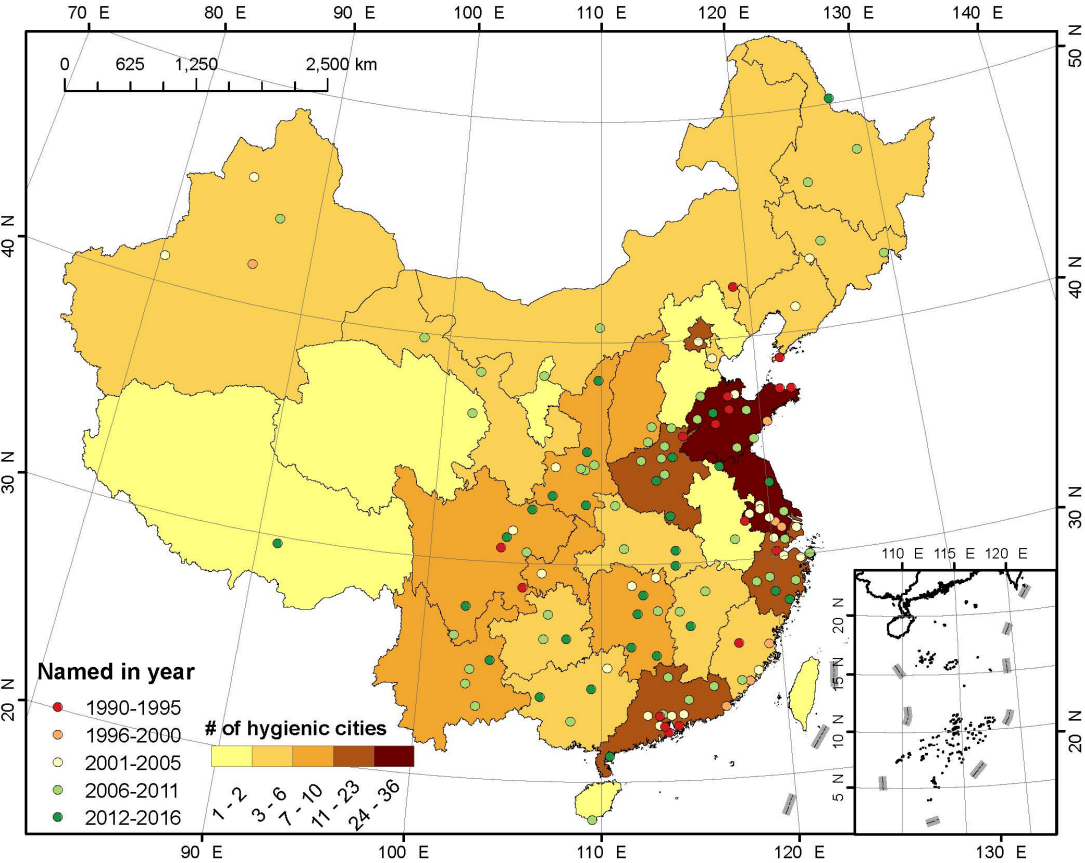

**Figure A2** The development of Hygienic Cities in China between 1990 and 2015

## Appendix 5 Comparison of health city indicators used in China and in Europe

Here we compared the indicator system of healthy cities (total 39 indicators) used by NPHCC to the Healthy Cities project indicators (total 32 indicators) used by WHO European Office<sup>1</sup> to give an example on the similarity and dissimilarity between China's indicator system and others (Table 1). There are other indicator systems such as WHO's Urban HEART and European Urban Health Indicators System, more can be found from Rothenberg et al. (2015)<sup>2</sup>.

### Reference

1. Webster P, Sanderson D. Healthy cities indicators-a suitable instrument to measure health? *J Urban Health* 2013; **90**(SUPPL 1): 52-61.
2. Rothenberg R, Stauber C, Weaver S, Dai D, Prasad A, Kano M. Urban health indicators and indices--current status. *BMC Public Health* 2015; **15**: 494.

Table 1 Comparison of indicator systems for healthy cities used in China and Europe (Words in bold fonts are categories used in the European system).

| Category                           | China                                                                                                                                                                                                                                                                                                                                                                                                                                                                           | Europe                                                                                                                                                                                                                                                                                                    |
|------------------------------------|---------------------------------------------------------------------------------------------------------------------------------------------------------------------------------------------------------------------------------------------------------------------------------------------------------------------------------------------------------------------------------------------------------------------------------------------------------------------------------|-----------------------------------------------------------------------------------------------------------------------------------------------------------------------------------------------------------------------------------------------------------------------------------------------------------|
| Healthy Population / <b>Health</b> | (1) Life expectancy<br>(2) Infant mortality rate<br>(3) Maternal mortality rate<br>(4) Prevalence of hypertension in adults<br>(5) Total incidence rate of infectious diseases<br>(6) Incidence rate of HIV/AIDS and the percentage of patients under management<br>(7) Incidence rate of tuberculosis<br>(8) Smoking rate of persons > 15 years<br>(9) Percentage of frequent exercisers<br>(10) Residents' health literacy                                                    | (1) Mortality<br>(2) Main causes of death<br>(3) Low birth weight                                                                                                                                                                                                                                         |
| Health services                    | (1) Percentage of patients with diabetes whose blood sugar levels are under control<br>(2) Percentage of patients with severe mental disorder who are under management<br>(3) Percentage of Children who are under management<br>(4) Percentage of women who have received care before giving birth<br>(5) Number of doctor/assistant doctor per 1 000<br>(6) Number of public health worker per 10 000<br>(7) Percentage of health expenditure to total government expenditure | (1) City health education programs<br>(2) Immunization rates<br>(3) Inhabitants per primary health care practitioner<br>(4) Inhabitants per nurse<br>(5) Percentage of population covered by health insurance<br>(6) Availability of services in foreign languages<br>(7) Health debates in civil council |

---

|                                                         |                                                                                                                                                                                                                                                                                                                                                                                                                                                                                                                                                                                                                                                                                                                                                               |                                                                                                                                                                                                                                                                                                                                                                                                                                               |
|---------------------------------------------------------|---------------------------------------------------------------------------------------------------------------------------------------------------------------------------------------------------------------------------------------------------------------------------------------------------------------------------------------------------------------------------------------------------------------------------------------------------------------------------------------------------------------------------------------------------------------------------------------------------------------------------------------------------------------------------------------------------------------------------------------------------------------|-----------------------------------------------------------------------------------------------------------------------------------------------------------------------------------------------------------------------------------------------------------------------------------------------------------------------------------------------------------------------------------------------------------------------------------------------|
|                                                         | (8) Number of beds per 1 000 elderlies                                                                                                                                                                                                                                                                                                                                                                                                                                                                                                                                                                                                                                                                                                                        |                                                                                                                                                                                                                                                                                                                                                                                                                                               |
| Healthy environment<br><b>/Environmental indicators</b> | <ul style="list-style-type: none"> <li>(1) Percentage of days with good air quality</li> <li>(2) Percentage of waste water subject to centralized processing</li> <li>(3) Percentage of tap water that meet quality standards (urban and rural)</li> <li>(4) Percentage of safety disposal of garbage</li> <li>(5) Prevalence rate of harmless toilets (rural)</li> <li>(6) Public green space per capita</li> <li>(7) Percentage of toilets meet and over the grade three</li> </ul>                                                                                                                                                                                                                                                                         | <ul style="list-style-type: none"> <li>(1) Air pollution</li> <li>(2) Water quality</li> <li>(3) Sewage collection</li> <li>(4) Household waste treatment</li> <li>(5) Green space</li> <li>(6) Derelict industrial sites</li> <li>(7) Sport and leisure facilities</li> <li>(8) Pedestrianization</li> <li>(9) Cycle routes</li> <li>(10) Public transport access</li> <li>(11) Public transport range</li> <li>(12) Living space</li> </ul> |
| Healthy society<br><b>/Socioeconomic indicators</b>     | <ul style="list-style-type: none"> <li>(1) Percentage of out-of-pocket expense to total health expenditure</li> <li>(2) Prevalence rate of basic endowment insurance</li> <li>(3) Unemployment rate in urban areas</li> <li>(4) Substitution rate of basic living allowance to consumption</li> <li>(5) Share of public transport in all journeys</li> <li>(6) Average gross floor area of living space for urban dwellers</li> <li>(7) Area of urban sportsgrounds per capita</li> <li>(8) Kilometers of healthy walking trails per 10 000</li> <li>(9) Mortality rate due to accidents per 100 million GDP</li> <li>(10) Percentage of food that meet the quality standards in investigation</li> <li>(11) Gross enrollment rate in high schools</li> </ul> | <ul style="list-style-type: none"> <li>(1) Percentage of population in inadequate housing</li> <li>(2) Homelessness</li> <li>(3) Unemployment</li> <li>(4) Poverty</li> <li>(5) Availability of child care</li> <li>(6) Age of mothers at time of birth</li> <li>(7) Abortion rate</li> <li>(8) Employment of disable people</li> </ul>                                                                                                       |
| Governance                                              | <ul style="list-style-type: none"> <li>(1) Health in all policies</li> <li>(2) Healthy City planning</li> <li>(3) Annual assessment report</li> </ul>                                                                                                                                                                                                                                                                                                                                                                                                                                                                                                                                                                                                         |                                                                                                                                                                                                                                                                                                                                                                                                                                               |

---

## Appendix 6 Methodological notes for the survey of actions adopted by cities in China in building healthy cities

In order to learn what have been done by cities in China in building healthy cities, we worked with the National Patriotic Health Campaign Committee (NPHCC) Office in National Health and Family Planning Commission to conduct a mail-in survey between February and March in 2017. NPHCC Office helped us to invite any cities that are working to become healthy cities to participate in the survey voluntarily. We developed a questionnaire with open questions to ask cities to report their actions in five aspects and any innovations in building healthy cities.

- Environmental management
- Health services
- Prevention and control of diseases
- Social services
- Actions to increase public participation

In total, we received responses from 36 cities, including 14 cities that have been included in the first batch of 38 cities in the national pilot program (Table 1).

Table 1 Names of cities that participated in the survey

| Types                                        | Names                                                                                                                                                                                                                |
|----------------------------------------------|----------------------------------------------------------------------------------------------------------------------------------------------------------------------------------------------------------------------|
| Cites included in the national pilot-program | Baoji, Changchun, Chengdu, Hangzhou, Karamay, Luzhou, Nanning, Ningbo, Suzhou, Weihai, Wuxi, Xicheng District (Beijing), Yichang, Zhengzhou                                                                          |
| Other cities                                 | Changzhou, Dongtai, Gaoyou, Gongyi, Guilin, Jiangyin, Jiyuan, Linzhou, Luoyang, Pingdingshan, Taicang, Tongling, Zhenjiang, Zhangjiagang, Xinxiang, Xinzheng, Xinyang, Xucang, Wugang, Yangzhong, Yizheng, Yongcheng |

## Appendix 7 Methodological notes on the calculation of the Baidu indices for hand-foot-mouth diseases

Here we show an example of using search inquiries to track the occurrence of HFMD disease because data from search engines respond quicker than passive disease surveillance systems and can reflect the current trend of the epidemic.

Baidu Index (<https://index.baidu.com/>) is an open-access platform which reflects trends of Baidu users' daily searching behaviors on both PCs and mobile terminals. We collected daily index data on HFMD related keywords (in Chinese) in Chengdu from May 1, 2013 to December 31, 2016. Thirty-eight keywords involving symptoms, transmission and treatments were collected. Daily aggregated counts of HFMD cases from 2013 to 2016 in Chengdu, China were obtained from CDC-Sichuan. No personal information was revealed. Both health data and index data were aggregated by week in this study.

In this study, we built a composite index.

$$index_j = \sum_{i=1}^j w_i x_i \quad (1)$$

where  $index_j$  represents the composite index of the first  $j$  keywords,  $x_i$  is a single keyword,  $w_i$  is the weight of  $x_i$ , that is determined by its cross-correlation with counts of HFMD cases,

$$HFMD = \alpha + \beta index_j + \varepsilon \quad (2)$$

where HFMD is weekly counts of HFMD cases,  $\varepsilon$  denotes residual term.

HFMD related keywords were sorted according to their cross-correlation with the counts of HFMD cases. Then the keywords were entered into equation 1 to form different composite indices. The process continued until  $R^2$  of the regression model (equation 2) did not increase.
