# Supplementary material
Source: PubMed Central journal article supplement (PMC7159272)
Supplement: mmc3.pdf [file mmc3.pdf]

# The Tsinghua–Lancet Commission on Healthy Cities in China:

Unlocking the power of cities for a healthy China

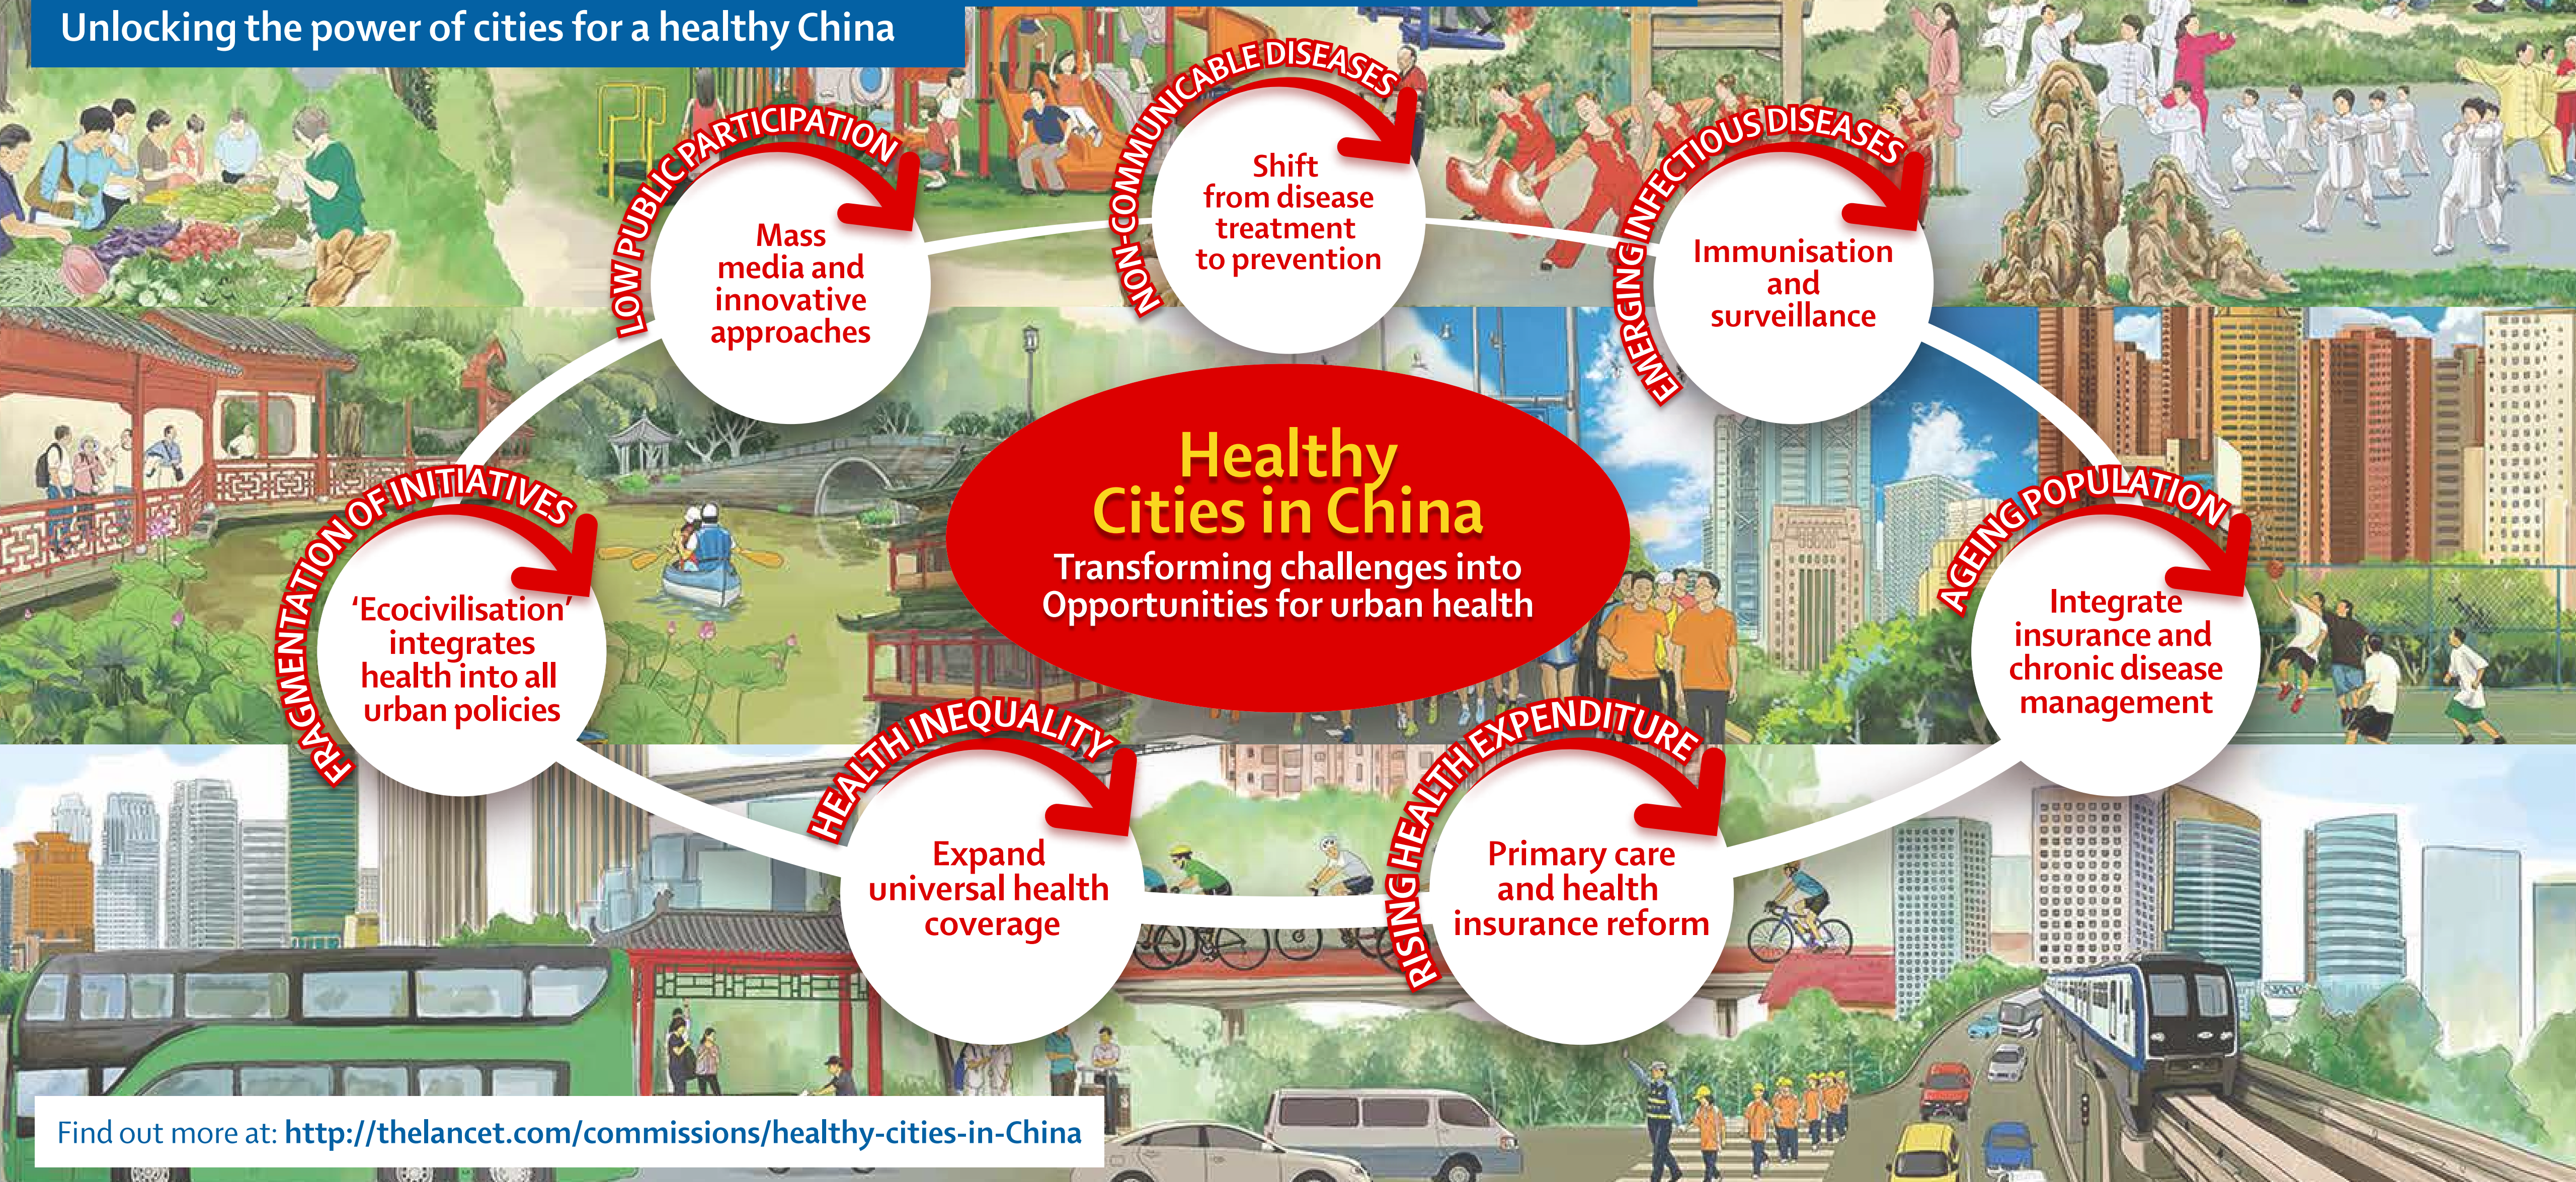

Find out more at: <http://thelancet.com/commissions/healthy-cities-in-China>
