# Supplementary material
Source: PubMed Central journal article supplement (PMC7159272)

# 清华大学—柳叶刀杂志中国健康城市委员会：

激发城市潜力、共筑健康中国

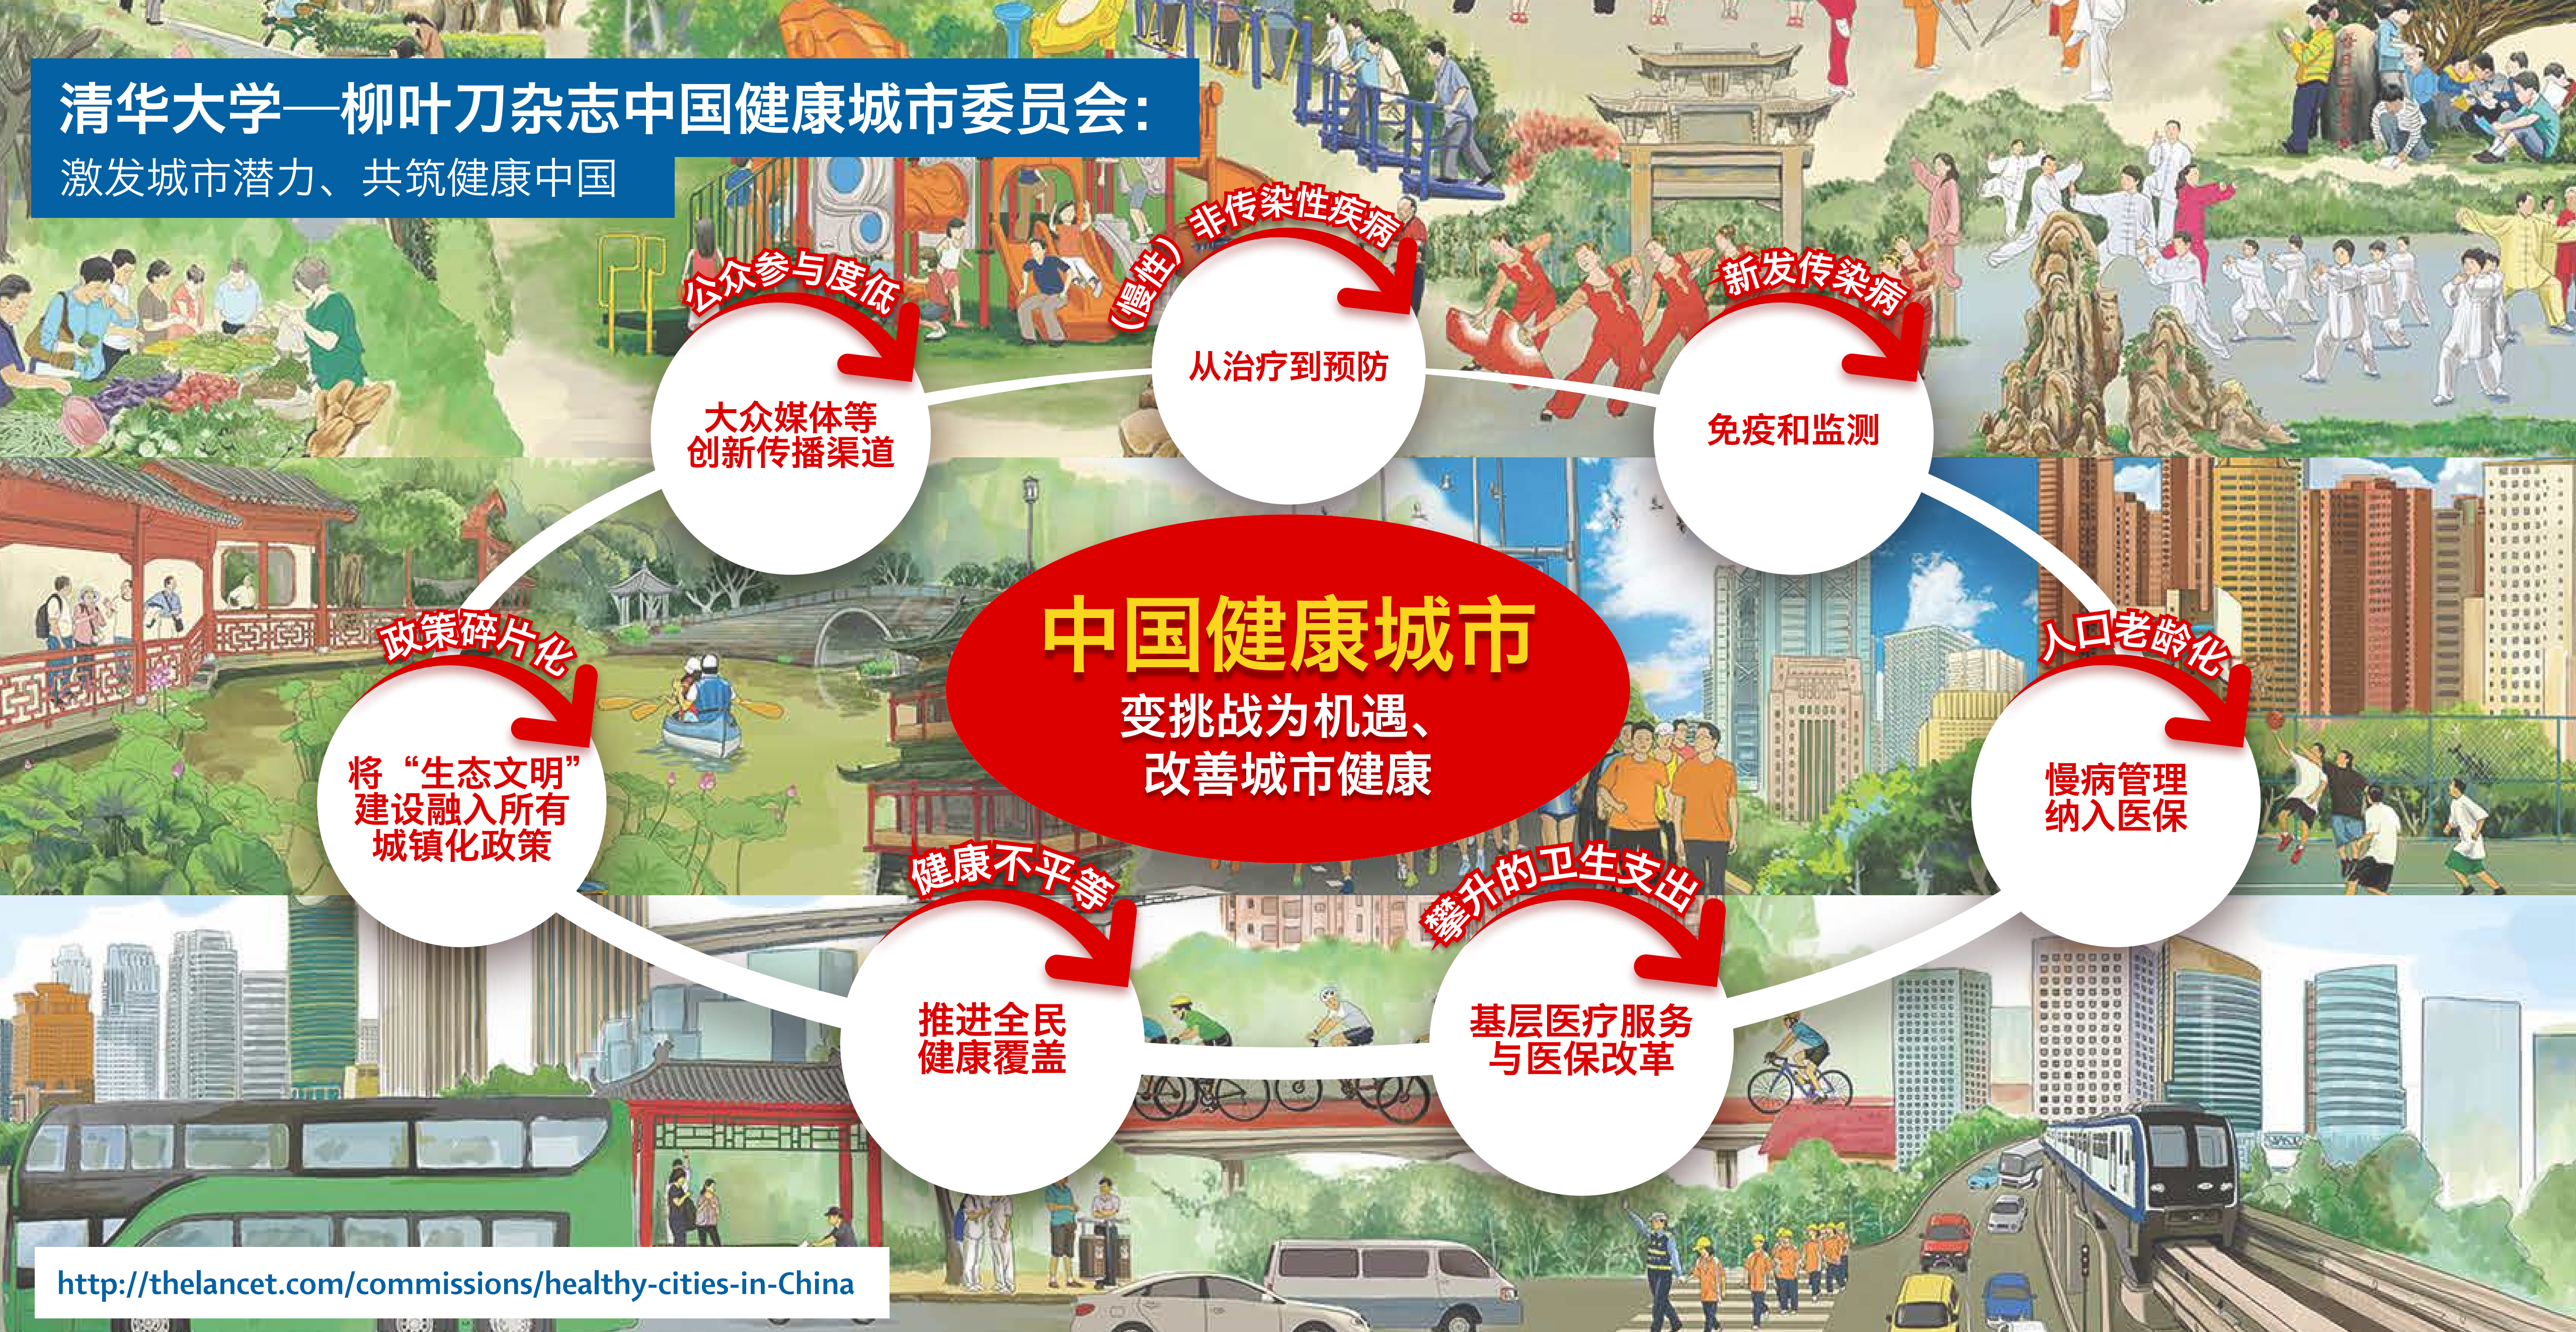

Supplement: mmc2.pdf [file mmc2.pdf]
